# Supplementary material for: The Carbon Switch at the Level of Pyruvate and Phosphoenolpyruvate in Sulfolobus solfataricus P2
Source: PubMed Central journal article supplement (PMC6474364; doi:10.3389/fmicb.2019.00757), 2019-04-12
Supplement: Data_Sheet_1.pdf [file Data_Sheet_1.pdf]

## Supplementary Material

### The carbon switch at the level of pyruvate and phosphoenolpyruvate in *Sulfolobus solfataricus* P2

Patrick Haferkamp, Britta Tjaden, Lu Shen, Christopher Bräsen, Theresa Kouril, and Bettina Siebers\*

#### \* Correspondence:

Prof. Dr. Bettina Siebers  
bettina.siebers@uni-due.de

#### 1. Supplementary Data

##### Gene sequence of the codon optimized PEPS (SSO0883) for expression in *Escherichia coli*:

```
CATATGGGCTCATTTCTCCTGGTTGAAGCGATTAGCTCCGAGGAAGACCTTATCCTCGATGTGTCTCA
AGTAACCAAAGACATGGTGCAGCTCGCGGGTGGTAAAGGGGCCAATCTGGGAGAACTGACTAGCATTG
GAGTGCCTGTTCTCCGGCATTATTCTTACCAGCAAAGCCTTCAAATACTTTCTGGAGTACAACAAT
CTCTTCGACAAAATTCGCGATACCTTGAGTTCGAGTGAGACCAGCGAAGAAGCGAGTGAGAAAATTAA
ACAGCTGATCAAAAACGCCAAAATGCCGGATAAACTGTCGTCCATGATCTATCAGGCCTACGATGAAC
TGAGCAAAAAGTAGGCAAAGAAAATCCTGGTAGCGGTACGGTCTTCGGCTACAGCGGAGGACATCGAA
ACAGCGAGTTTTGCTGGTCAGCAGGATACGTACCTGAATGTGACCAAAGATGAGCTGATTGATCGCAT
TAAAGACGTGTGGCCAGCTTGTACAATGCCCGTGCCATGGAATATCGCAAAAAGTAAAGGCATTGACG
ATTTATCGATTCTGATTGCCGTGGTTCGTCAGAAAATGGTTAATTCTCGTTCCGCAGGCGTTATGTTT
ACTCTGCATCCGGTAACGGGTGATGAGAAATACATTATGATCGAATCGAACTGGGGTCTTGCGCAATC
CGTCGTCCGTGGCAAAGTCACGCCGTGATGAAGTGTGATTGAAAAGTCGACCTTACGCATCGTTGAGA
AGAAAGTTTCGAACAAGAACATCAAATCGTTTACGACAAACAGCTGAAGAAGAATGTCACCATTACC
CTGGACGAGAAAGAAAGTCGCCGTGATGAGCATTACGGACGAAGAAGCGATTGAATTAGCAAACTGGC
TCTGAAAATTGAAGAACACTATAAACGCCCAATGGATATTGAGTGGGCCATTGACAACGATTTGTCTT
TTCCCGAAAACATCTTCATTGTACAGGCACGTCCGGAAACCTTCTGGTCTTCCAAACGCAAAGAAAAC
AAGAATATTGCGGAGAAAAGCGCCCAATTGGTGGTAAAGTCTGGTTTCGTGGTCTTGCTGCGTCACC
AGGGATTGCCTTTGGCAAAGCAAAGATTATTTTGGATATCAAAGATCCGAAGGTTTCATGAGTTCAGA
AGGGTGAAATTCTGGTGACCAAAAATGACTGATCCGGACTGGGTACCGCTCATGAAAATCGCAGGCGCG
ATCATCACCGATGAAGGAGGGATGACGTACATGCGGCCATTGTCTCACGTGAACTGGGTATCCCCGC
GATCGTTGGTTCTCGCGAAGCAACTAAAATCATCCGCGATAACCAGGAAATCACAGTGGATGCCATCC
GTGGCATTGTGTATGAAGGCAAGGTTCTTCAAACGAGCGAAAACAGTGAGCCAACAGGCTCAACCGAGC
ATTGGCATCCAGGGCATTAGTTCGCGAGGTGTTGTTAAGCTTATACCCGGTTACCGCGACTAAAATCTA
CATGAACCTGGGCGAGCCAGATGTGATCGATAAATACCTGGACCTGCCGTTTGTATGGCATTGGTTTAA
TGCGTATCGAATTTATTGTATCCGAGTGGGTACGCTATCACCCGCTGTATCTGATCAAGATCGGTAAC
GCGGAACTGTTTGTGGACAAACTGGCCGAAGGTATCGCTAAGGTCGCATCTGCGATCTATCCGCGTCC
CGTTGTTGTGCGGTTTCAGCGACTTAAAGACGAACGAATACAAAAAACTCATTGGAGGAGAAGAATTTG
AACCTGATGAACGTAACCCGATGATCGGTTGGCGTGGGGTCAGCCGTTATGTGTCGAAAGAATATGAA
CCGGCGTTTCGGTTAGAAGCCAAGGCGATTTCGCAAAGTTCGCGAAGAAATGGGCTTAAAGAATGTCTG
GGTTATGTTCCCGTTTGTGCGCACCACTGGGAACTGGAGAAAGCGATCAAAATCATGGAGGAAGAAG
GCCTGCGCCGCGATTTCAGATTTCAAAGTCTGGATTATGGCAGAGGTACCTTCTGTGCTGGTTCTGGCC
GAGGAATTCGCTAAAATTTGTGGATGGGTTCTCGGTTGGCTCAAATGATCTCGCACAATTGACGTTGGG
CGTTGATCGCGATTCTGAGTTGCTGGCACGCATGGGCTATTATGATGAGCGCGACCCAGCAGTCCCTGG
AAAGCATTTCGTAACCTGATTAAGCGGCGCACAAATATGGGAAAACGGTGAGTATTTGCGGCCAAGCT
CCGAGCGTGTATCCTGCAGTAGTGGAGTATCTTGTCAAAGCTGGTATTGACAGTATTTTCAGTGAATCC
CGACGCGGTGATTAACGTGCGCCGTCAAGTGGCTTCCATTGAACAGCAGATCATTCTTCGGAATCTGA
ATGGGAAACGTAAGAACAATAAGGATCC
```

## 2. Supplementary Figures and Tables

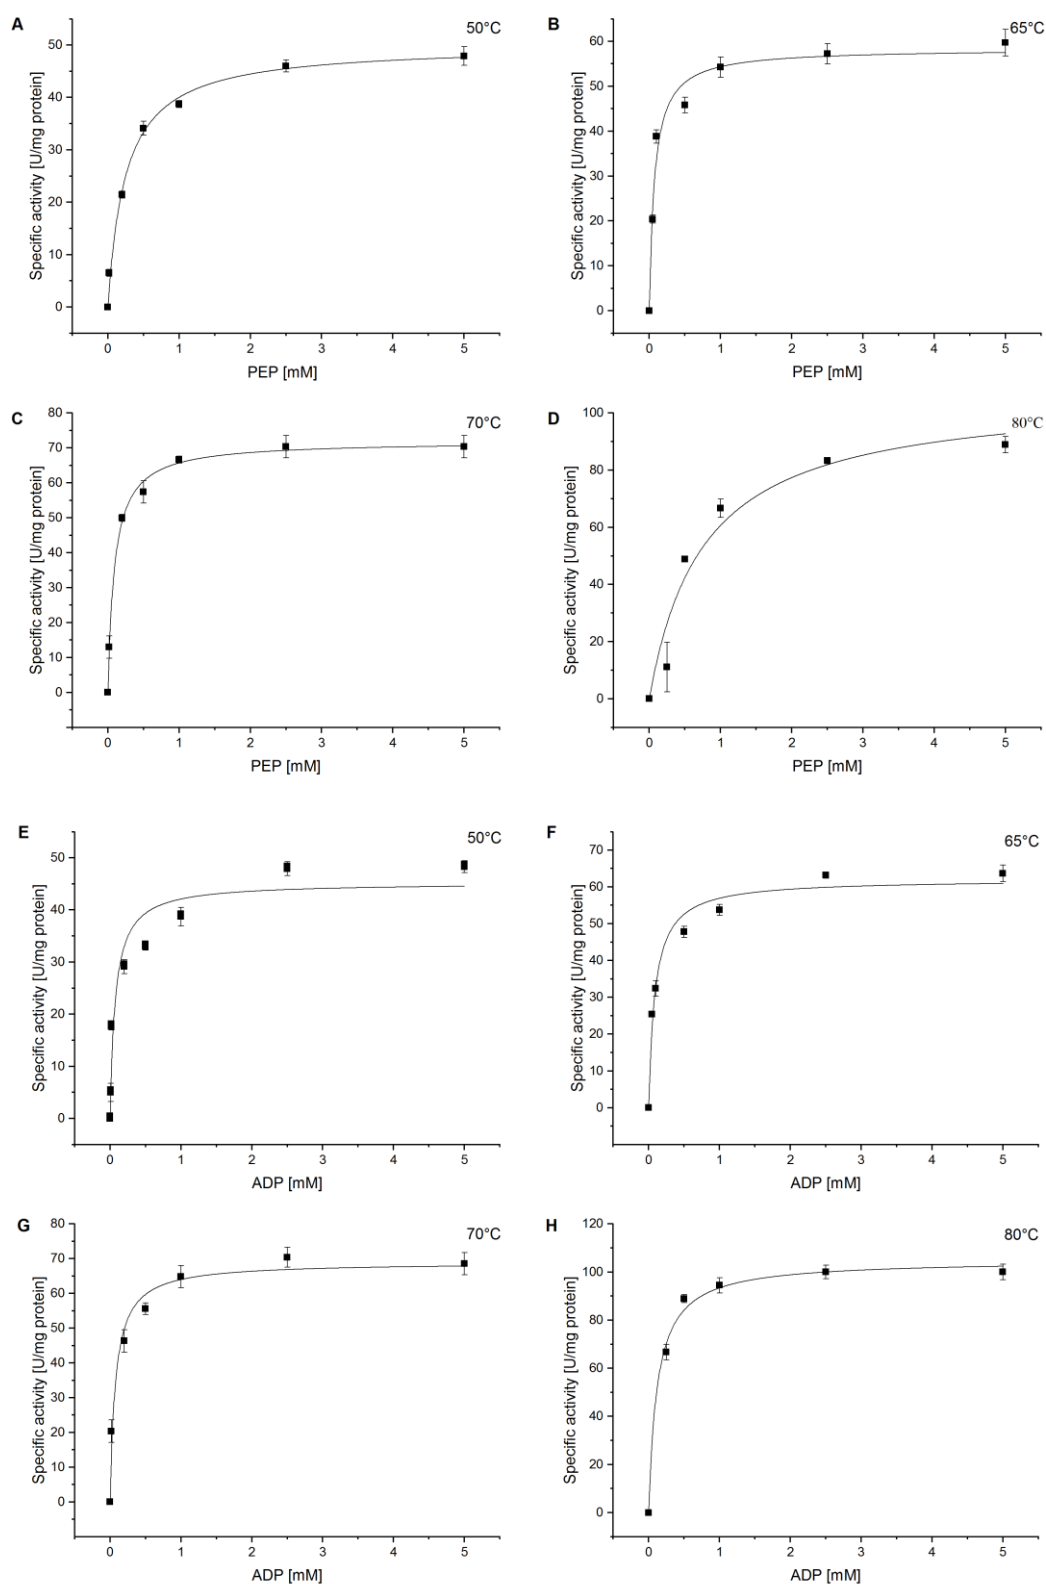

**Supplementary Figure 1.** Characterization of PK from *Sul. solfataricus*. PK activity with PEP (A-D) and ADP (E-H) was determined at 50°C, 65°C, 70°C and 80°C. All measurements were performed in triplicate, the points in the figures are the mean values and the error bars indicate the standard deviation.

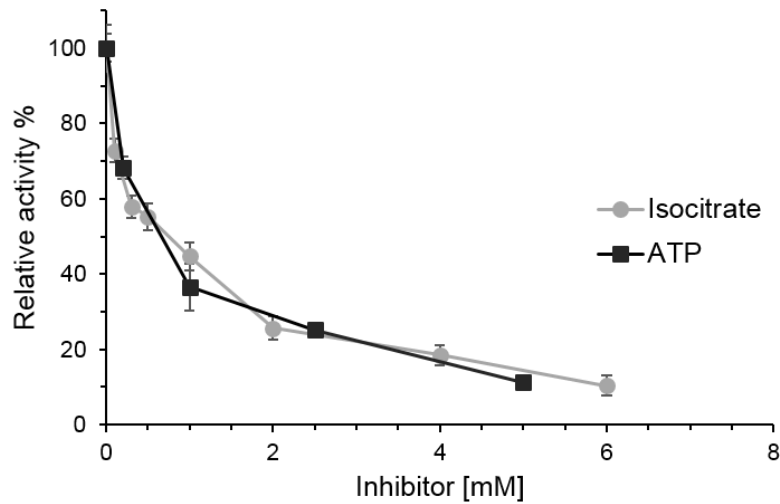

**Supplementary Figure 2.** Regulation of PK activity. The inhibition of PK activity by ATP and isocitrate was determined at half-saturating concentration of ADP and PEP at 60°C. All measurements were performed in triplicate, the points in the figures are the mean values and the error bars indicate the standard deviation.

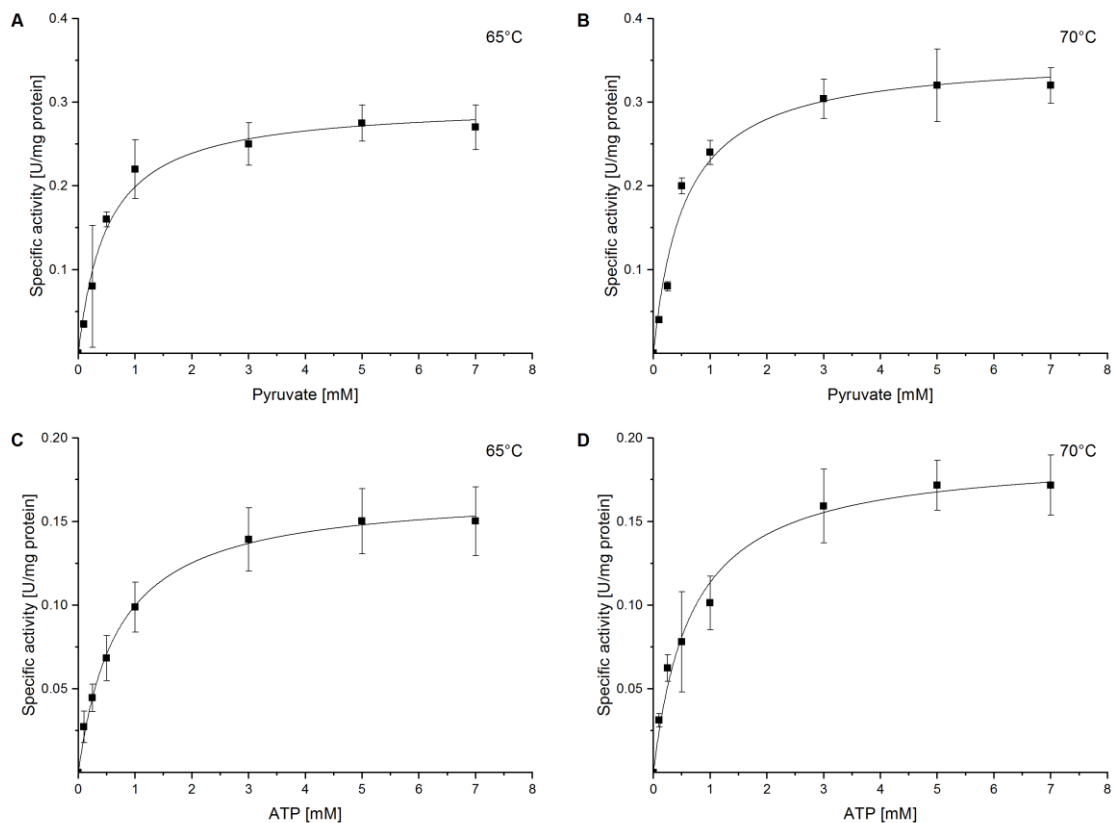

**Supplementary Figure 3.** Characterization of PEPS from *Sul. Solfataricus*. PEPS activity with pyruvate (A and B) and ATP (C and D) was determined at 65°C and 70°C. All measurements were performed in triplicate, the points in the figures are the mean values and the error bars indicate the standard deviation.

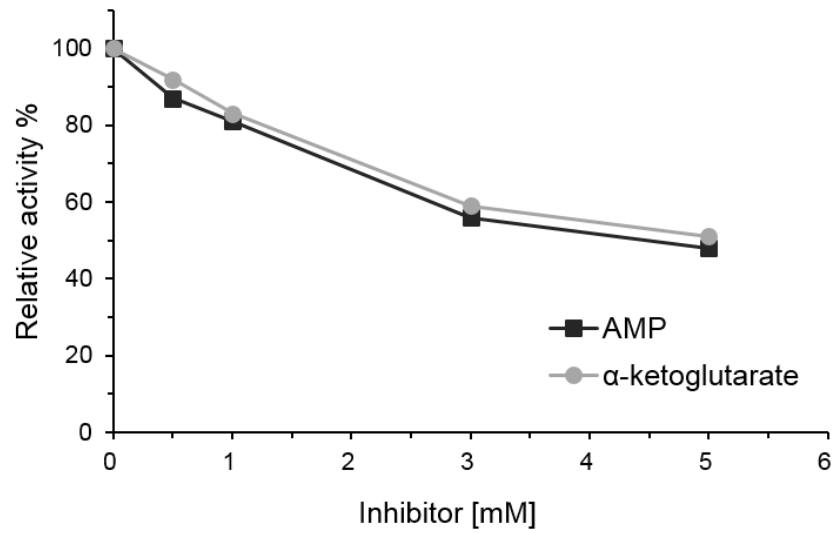

**Supplementary Figure 4.** Regulation of PEPS activity. The inhibition of PEPS activity by AMP and  $\alpha$ -ketoglutarate was determined at half-saturating concentration of ATP and pyruvate at 70°C.
